# Supplementary material
Source: PubMed Central journal article supplement (PMC4001730)
Supplement: NIHMS569488-supplement-01.pdf [file NIHMS569488-supplement-01.pdf]

## Sours et al. SUPPLEMENTAL MATERIALS

### SUPPL. FIGURES

**Fig. S1. Peptide coverage in ERK2.** (A) The sequence of ERK2, with bars summarizing peptides observed by HX-MS. Peptides colored grey were observed in all six forms of ERK2 (0P-WT, 2P-WT, 0P-LM/GG, 0P-ME/GG, 0P-ET/GG, 0P-TD/GG). Peptides revealing differential proteolysis within the activation lip are colored Orange: dual phosphorylated (2P), or Green: unphosphorylated (0P) and linker mutants. (B) Peptides at the hinge show different proteolysis between hinge mutants, as indicated. Only the peptide corresponding to residues 101-110 (WT sequence <sup>101</sup>IVQDLMETDL<sup>110</sup>) was observed in all six ERK2 forms. (C) The Gly-Gly mutation increases deuteration at the hinge, shown by peptide GGTDL in ME/GG-ERK2 (blue) compared to peptide METDL in 0P-ERK2 (red) and 2P-ERK2 (black). Curves are shown for apo enzyme (solid lines) and in the presence of 1 mM AMP-PNP (dashed lines). (D) The Gly-Gly mutation increases deuteration at the hinge, shown by peptide LMEGGL in TD/GG-ERK2 (purple) compared to peptide METDL in 0P-ERK2 (red) and 2P-ERK2 (black). Curves are shown for apo enzyme (solid lines) and in the presence of 1 mM AMP-PNP (dashed lines).

**Fig. S2. Thermodynamics of AMP-PNP binding to wild type and mutant ERK2.** Data from isothermal titration calorimetry (ITC) show isotherms for AMP-PNP binding to ERK2 WT and mutant proteins. In each case, upper panels show raw data and lower panels show integrated areas after baseline subtraction. Fitted parameters are indicated in the lower panels ( $K_d \pm$  s.d. measurements (n=3 for unphosphorylated ERK2 proteins and n=2 for 2P-ERK2) and are summarized in Table 1.

**Fig. S3. Specific activities of combinatorial mutants of ERK2.** Initial rate measurements (nmol/min/mg) for WT-ERK2 (A), ME/GG-ERK2 (B), and ET/GG-ERK2 (C) along with eight activation lip mutations are shown, along with a subset of the LM/GG-ERK2 (B) and TD/GG-ERK2 (C) mutants. Mutants were assayed in their unphosphorylated states or following phosphorylation by active MKK1, as indicated. Bar graphs show average  $\pm$  s.d. of triplicate measurements.

**Fig. S4. HX-MS analysis for activation lip mutants of ERK2.** Time courses compare HX in unphosphorylated (●) and phosphorylated (○) forms of ERK2, within hinge peptide METDL<sub>110</sub>. Like 2P-ERK2, EEpY-ERK2 shows increased HX in METDL, whereas all other forms show decreased HX. This suggests that only EEpY-ERK2 enhances hinge flexibility, as seen with 2P-ERK2.

### SUPPL. TABLES

**Table S1: Observed monoisotopic masses in the HX-MS experiment for 0P- and 2P-WT-ERK2 and hinge mutants.**

**Table S2: Kinetic parameters for ERK2 in-exchange, fit by non-linear least squares.**

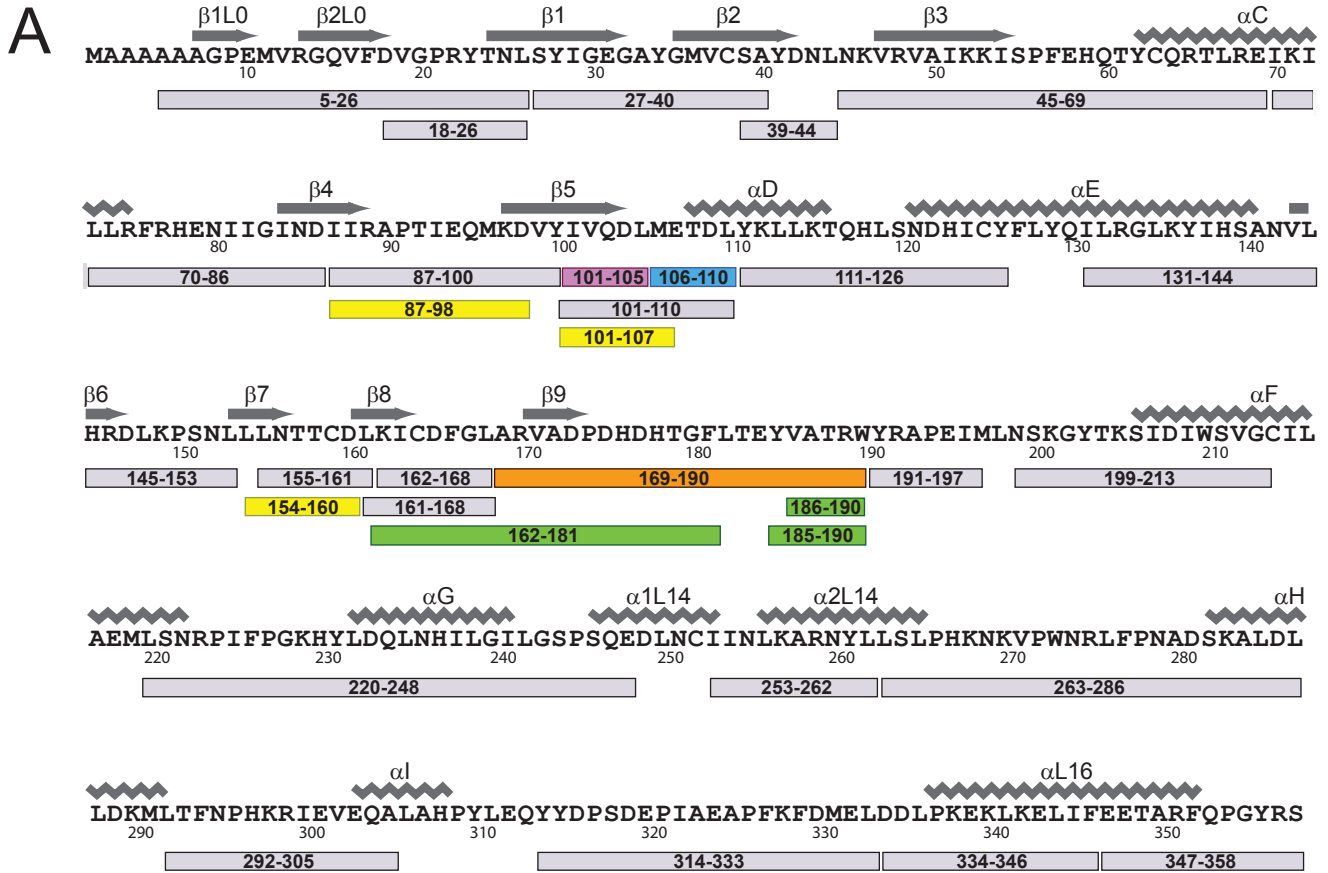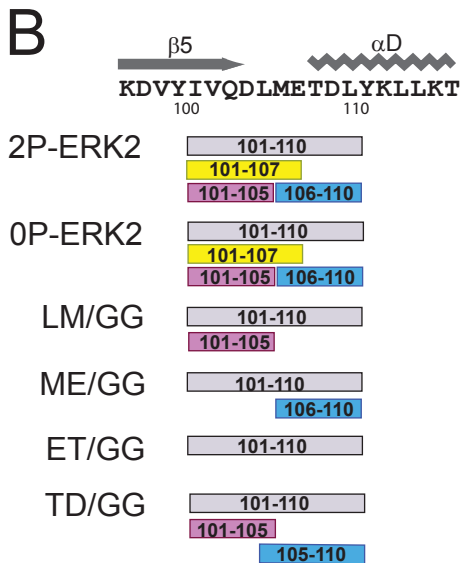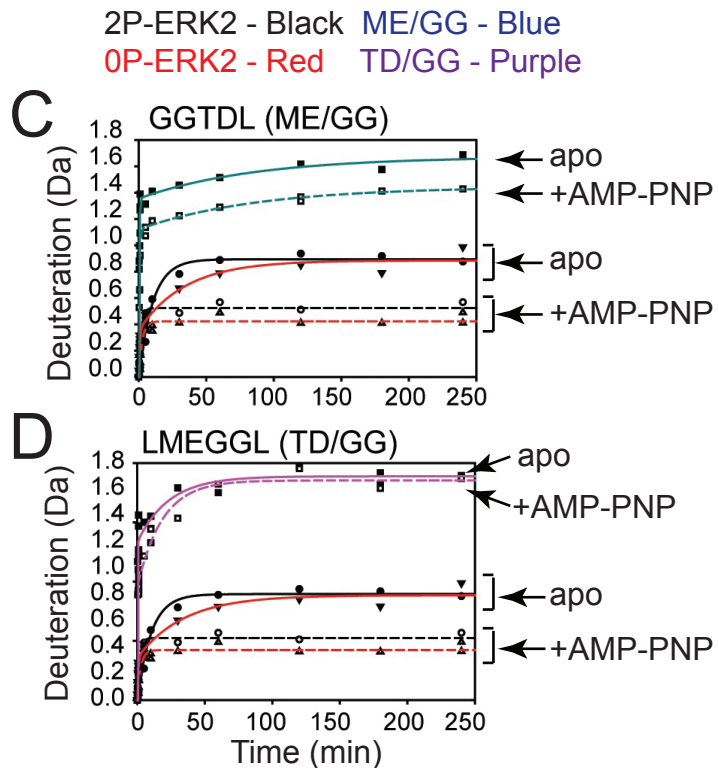

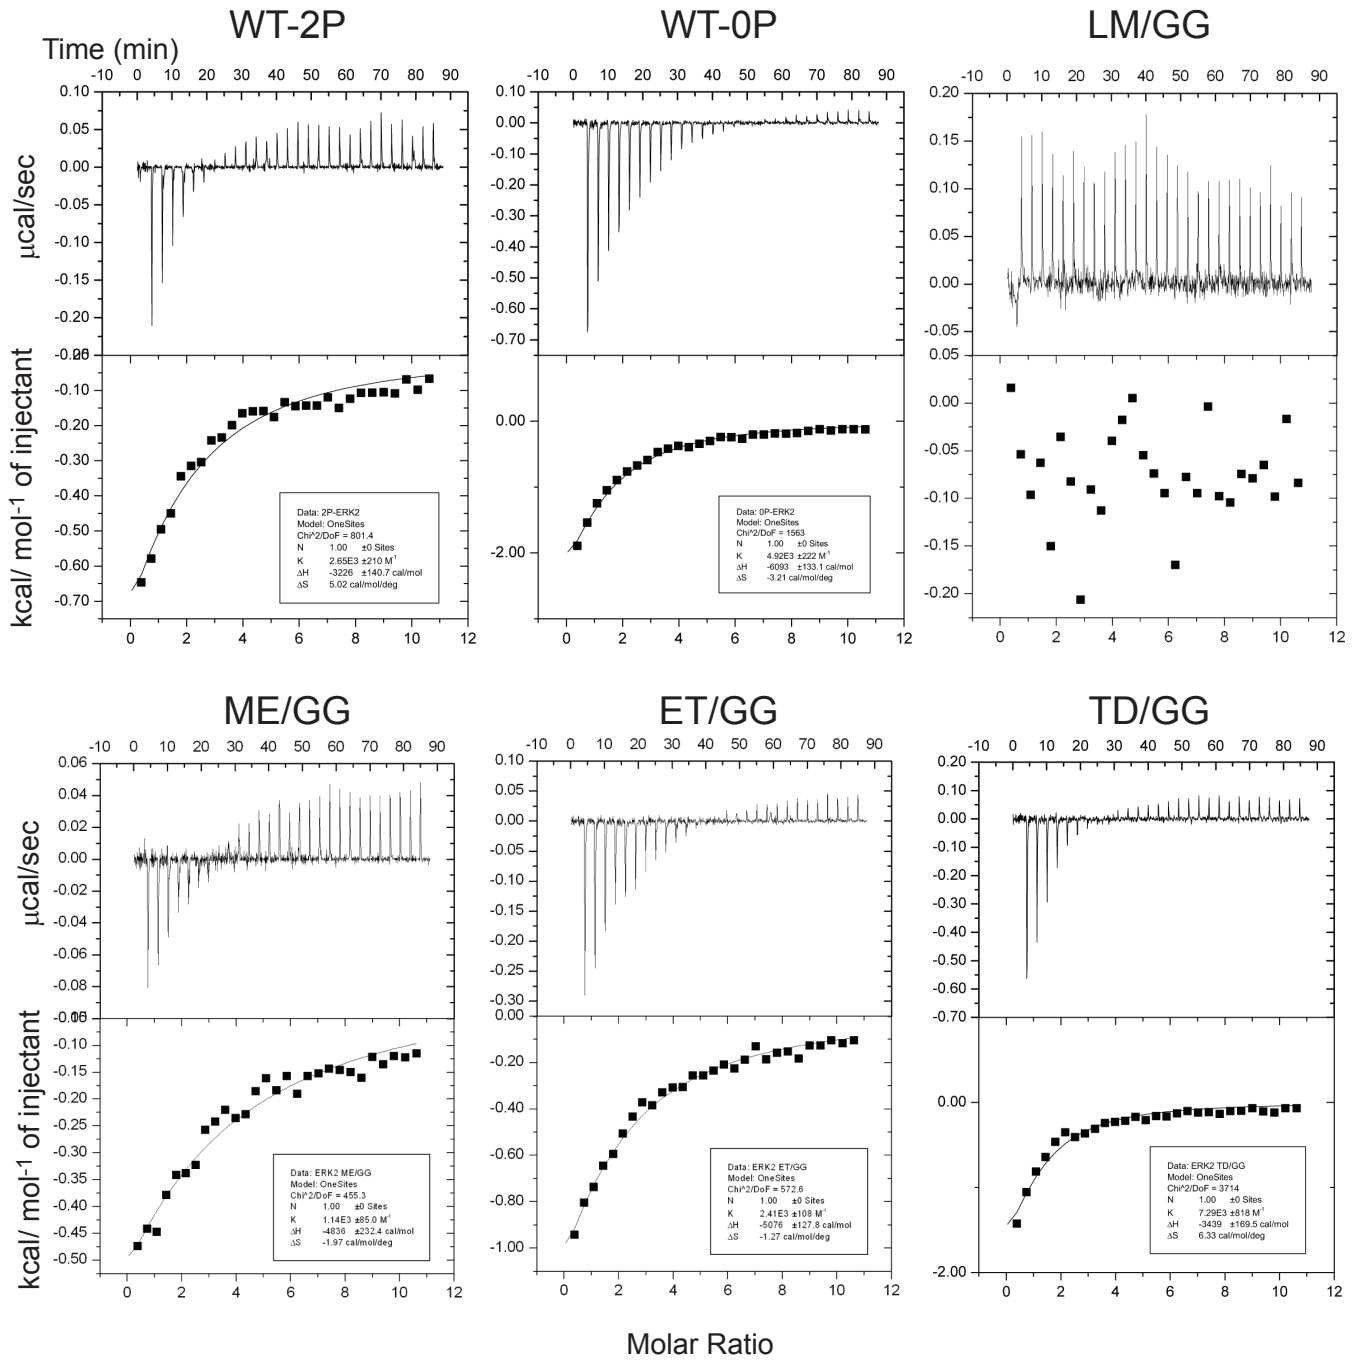



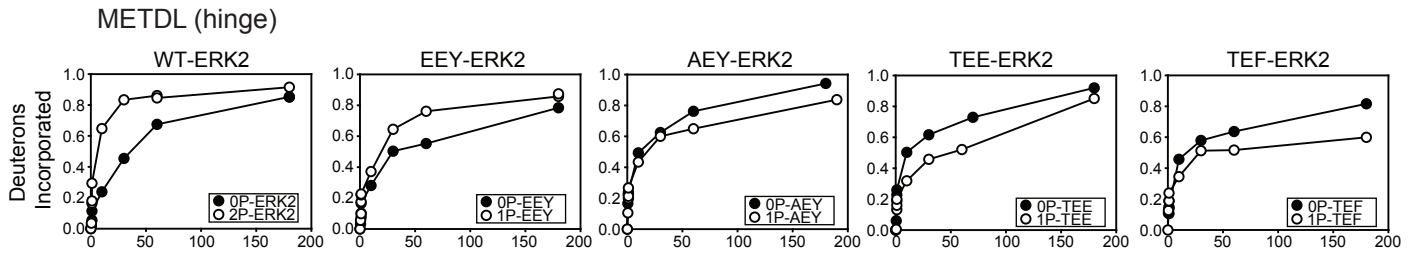

**Table S1: Observed peptides in HX-MS experiments of 0P-WT, 2P-WT and hinge mutants of ERK2.**

| Residues | Peptide sequence              | # Exch. Amides | Calc. Mass | Calc. m/z of ion | Observed m/z of analyzed peptide ion |         |         |         |         |         | LC elution time |
|----------|-------------------------------|----------------|------------|------------------|--------------------------------------|---------|---------|---------|---------|---------|-----------------|
|          |                               |                |            |                  | 2P-WT                                | 0P-WT   | LM/GG   | ME/GG   | ET/GG   | TD/GG   |                 |
| 5.26     | AAAGPEMVRGQVFDVGPRTNL         | 19             | 2347.17    | 783.39           | 783.44                               | 783.40  | 783.42  | 783.41  | 783.42  | 783.47  | 9.6             |
| 18.26    | DVGPRYTNL                     | 7              | 1033.52    | 517.76           | 517.79                               | 517.81  | 517.82  |         | 517.81  | 517.80  | 7.5             |
| 27.40    | SYIGEGAYGMVCSA                | 13             | 1406.58    | 704.29           | 704.29                               | 704.31  | 704.35  | 704.33  | 704.35  | 704.37  | 9.5             |
| 39.44    | SAYDNL                        | 5              | 681.30     | 682.30           | 682.32                               | 682.33  | 682.34  | 682.31  | 682.34  | 682.37  | 6.7             |
| 45.69    | NKVRVAIKKISPFHQTYCQRTLRE      | 23             | 3043.65    | 1015.55          | 1015.55                              | 1015.62 | 1015.54 | 1015.57 | 1015.62 | 1015.64 | 8.2             |
| 70.86    | IKILLRFRHENIIGIND             | 16             | 2063.20    | 688.73           | 688.74                               | 688.77  | 788.74  | 788.75  | 688.78  | 688.80  | 9.3             |
| 87.98    | IIRAPTIEQMKD                  | 10             | 1413.76    | 707.88           | 707.87                               | 707.88  |         |         |         |         | 7.9             |
| 87.100   | IIRAPTIEQMKDVY                | 12             | 1675.90    | 838.95           | 838.94                               | 838.99  | 839.00  | 839.00  | 839.00  | 839.01  | 9.2             |
| 101.105  | IVQDL                         | 4              | 586.33     | 586.33           | 587.32                               | 587.35  |         |         |         | 587.38  | 5.8             |
| 101.107  | IVQDLME                       | 6              | 846.42     | 847.42           | 847.44                               | 847.42  |         |         |         |         | 7.3             |
| 101.110  | IVQDLMETDL                    | 9              | 1175.57    | 1176.57          | 1176.56                              | 1176.56 |         |         |         |         | 9.0             |
| 101.110  | IVQDGGETDL                    | 9              | 1045.49    | 1046.49          |                                      |         | 1046.54 |         |         |         | 6.0             |
| 101.110  | IVQDLGGTDL                    | 9              | 1029.53    | 515.77           |                                      |         |         | 515.81  |         |         | 7.7             |
| 101.110  | IVQDLMGGDL                    | 9              | 1059.53    | 1060.53          |                                      |         |         |         | 1060.67 |         | 9.0             |
| 101.110  | IVQDLMEGGL                    | 9              | 1073.54    | 1074.54          |                                      |         |         |         |         | 1074.66 | 6.0             |
| 105.110  | LMEGGL                        | 5              | 618.30     | 619.30           |                                      |         |         |         |         | 619.39  | 7.0             |
| 106.110  | METDL                         | 4              | 607.25     | 608.26           | 608.25                               | 608.28  |         |         |         |         | 6.4             |
| 106.110  | GGTDL                         | 4              | 461.21     | 462.21           |                                      |         |         | 462.22  |         |         | 7.0             |
| 111.126  | YKLLKTQHLSNDHICY              | 15             | 1975.00    | 659.33           | 659.35                               | 659.39  | 659.35  | 659.36  | 659.39  | 659.41  | 8.2             |
| 131.144  | ILRGLKYIHSANVL                | 13             | 1595.95    | 532.98           | 532.99                               | 532.97  | 532.97  | 532.99  | 532.97  | 533.00  | 8.7             |
| 145.153  | HRDLKPSNL                     | 7              | 1078.59    | 540.29           | 540.30                               | 540.33  | 540.30  | 540.31  | 540.32  | 540.35  | 5.6             |
| 154.160  | LLNTTCD                       | 6              | 778.35     | 779.35           | 779.36                               | 779.37  | 779.36  | 779.38  | 779.43  | 779.43  | 5.0             |
| 155.161  | LNTTCDL                       | 6              | 778.35     | 779.35           | 779.36                               | 779.39  |         |         |         |         | 7.1             |
| 161.168  | LKICDFGL                      | 7              | 907.48     | 454.74           | 454.76                               | 454.78  | 454.76  | 454.76  | 454.76  | 454.77  | 10.0            |
| 162.168  | KICDFGL                       | 6              | 794.40     | 795.40           | 795.42                               | 795.43  | 795.42  | 795.43  | 795.44  | 795.49  | 9.0             |
| 162.181  | KICDFGLARVADPDHDHTGF          | 18             | 2213.03    | 1107.52          |                                      | 1107.56 | 1107.56 | 1107.6  | 1107.61 | 1107.62 | 9.1             |
| 169.190  | ARVADPDHDHTGFLpTEpYVATRW      | 20             | 2716.15    | 680.04           | 680.07                               |         |         |         |         |         | 10.0            |
| 185.190  | YVATRW                        | 5              | 794.41     | 795.41           |                                      | 795.44  | 795.44  | 795.43  | 795.44  | 795.49  | 8.1             |
| 186.190  | VATRW                         | 4              | 631.34     | 632.34           |                                      | 632.41  |         |         |         |         | 6.8             |
| 191.197  | YRAPEIM                       | 5              | 878.43     | 440.23           | 440.21                               | 440.23  | 440.24  | 440.25  | 440.25  | 440.25  | 7.7             |
| 199.213  | NSKGYTKSIDIWSVG               | 14             | 1653.84    | 827.92           | 827.92                               | 827.94  | 827.92  | 827.94  | 827.99  | 828.00  | 9.4             |
| 220.248  | LSNRPIFPKGHYLDQLNHILGILGSPSQE | 25             | 3242.72    | 1081.91          | 1081.97                              | 1082.90 | 1081.96 | 1081.95 | 1081.95 | 1081.98 | 10.8            |
| 253.262  | IINLKARNYL                    | 9              | 1216.73    | 609.36           | 609.38                               | 609.40  | 609.38  | 609.40  | 609.39  | 609.44  | 8.3             |
| 263.286  | LSLPHKNKVPWNRLFNPADSKALDL     | 21             | 2872.57    | 958.52           | 958.6                                | 958.50  | 958.53  | 958.57  | 958.58  | 958.58  | 9.9             |
| 292.305  | LTFNPHKRIEVEQA                | 12             | 1680.89    | 841.45           | 841.47                               | 841.42  | 841.47  | 841.49  | 841.52  | 841.54  | 7.9             |
| 314.333  | YYDPSDEPIAEAPFKFDMEL          | 16             | 2376.05    | 1189.03          | 1189.01                              | 1189.06 | 1189.01 | 1189.07 | 1189.08 | 1189.11 | 11.0            |
| 334.346  | DDLKPEKLELIF                  | 11             | 1586.89    | 529.96           | 529.99                               | 530.01  | 529.99  | 529.99  | 530.01  | 530.00  | 9.4             |
| 347.358  | EETARFQPGYRS                  | 10             | 1439.68    | 720.84           | 720.84                               | 720.89  | 720.87  | 720.89  | 720.91  | 720.89  | 6.8             |

**Table S2: Fitted kinetic parameters for hydrogen-deuterium exchange time courses of WT and mutant ERK2.**

| Sequence <sup>(1)</sup> | ERK2     | %BE     | Condition | Avg StDev |              | RSS           | A <sup>(2)</sup> (s.d.) | B (s.d.)     | C (s.d.)      | N (s.d.)      | k <sub>1</sub> (s.d.) | k <sub>2</sub> (s.d.) | k <sub>3</sub> (s.d.) |  |
|-------------------------|----------|---------|-----------|-----------|--------------|---------------|-------------------------|--------------|---------------|---------------|-----------------------|-----------------------|-----------------------|--|
|                         |          |         |           | at 1 min  |              |               |                         |              |               |               |                       |                       |                       |  |
| AAAGPEMVRGQVFDVGPRTNL   | 2P-WT    | 20.5%   | Control   | 0.0987    | 2.499        | 7.290(0.768)  | 4.471(0.568)            |              | 11.761(0.215) | 8.800(5.072)  | 0.345(0.104)          |                       |                       |  |
|                         |          |         | AMP-PNP   | 0.2301    | 1.790        | 10.598(0.637) | 1.858(0.551)            |              | 12.456(0.213) | 1.805(0.218)  | 0.048(0.036)          |                       |                       |  |
|                         | 0P-WT    | 19.4%   | Control   | 0.1955    | 0.743        | 6.247(0.938)  | 5.384(0.895)            |              | 11.632(0.136) | 4.705(1.272)  | 0.456(0.148)          |                       |                       |  |
|                         |          |         | AMP-PNP   | 0.1538    | 2.758        | 10.074(0.567) | 2.500(0.509)            |              | 12.573(0.356) | 3.146(0.557)  | 0.029(0.018)          |                       |                       |  |
|                         | LM/GG    | 20.8%   | Control   | 0.1001    | 2.001        | 9.518(0.475)  | 3.457(0.435)            |              | 12.975(0.194) | 4.552(0.815)  | 0.153(0.053)          |                       |                       |  |
|                         |          |         | AMP-PNP   | 0.2488    | 1.132        | 9.590(0.458)  | 3.416(0.330)            |              | 13.006(0.113) | 8.598(2.242)  | 0.244(0.070)          |                       |                       |  |
|                         | ME/GG    | 20.5%   | Control   | 0.3247    | 2.410        | 9.077(0.888)  | 3.187(0.678)            |              | 12.263(0.289) | 5.816(1.804)  | 0.245(0.148)          |                       |                       |  |
|                         |          |         | AMP-PNP   | 0.3453    | 3.128        | 9.202(0.871)  | 3.441(0.750)            |              | 12.643(0.305) | 2.598(0.643)  | 0.066(0.037)          |                       |                       |  |
|                         | ET/GG    | 20.5%   | Control   | 0.1233    | 2.929        | 7.854(0.860)  | 4.472(0.699)            |              | 12.325(0.181) | 4.709(1.076)  | 0.298(0.114)          |                       |                       |  |
|                         |          |         | AMP-PNP   | 0.1927    | 2.838        | 8.146(0.709)  | 4.367(0.498)            |              | 12.512(0.218) | 6.288(1.610)  | 0.178(0.060)          |                       |                       |  |
|                         | TD/GG    | 20.1%   | Control   | 0.0853    | 1.038        | 7.696(0.487)  | 4.840(0.376)            |              | 12.536(0.152) | 5.250(0.185)  | 0.185(0.033)          |                       |                       |  |
|                         |          |         | AMP-PNP   | 0.2761    | 1.145        | 7.188(0.417)  | 5.395(0.266)            |              | 12.583(0.153) | 8.201(2.564)  | 0.172(0.026)          |                       |                       |  |
|                         | DVGPRTNL | 2P-WT   | 37.3%     | Control   | 0.1300       | 0.066         | 1.511(0.094)            |              |               | 1.511(0.035)  | 0.716(1.103)          |                       |                       |  |
|                         |          |         |           | AMP-PNP   | 0.0682       | 0.117         | 1.224(0.151)            | 0.948(0.110) |               | 2.172(0.065)  | 3.800(1.360)          |                       |                       |  |
|                         |          | 0P-WT   | 30.9%     | Control   | 0.2465       | 0.451         | 0.997(0.301)            | 1.195(0.273) |               | 2.192(0.078)  | 4.058(3.324)          | 0.270(0.122)          |                       |  |
|                         |          |         |           | AMP-PNP   | 0.1068       | 0.264         | 1.360(0.236)            | 0.978(0.200) |               | 2.338(0.064)  | 7.958(6.992)          | 0.293(0.162)          |                       |  |
| LM/GG                   |          | 21.7%   | Control   | 0.0500    | 0.108        | 2.382(0.252)  | 0.236(0.228)            |              | 2.618(0.080)  | 1.657(0.349)  | 0.059(0.128)          |                       |                       |  |
|                         |          |         | AMP-PNP   | 0.1006    | 0.171        | 1.857(0.174)  | 0.879(0.114)            |              | 2.736(0.057)  | 8.441(4.583)  | 0.105(0.043)          |                       |                       |  |
| ME/GG                   |          |         | Control   |           |              |               |                         |              |               |               |                       |                       |                       |  |
|                         |          |         | AMP-PNP   |           |              |               |                         |              |               |               |                       |                       |                       |  |
| ET/GG                   |          | .3686   | Control   | 0.0475    | 0.523        | 0.984(0.473)  | 0.990(0.462)            |              | 1.974(0.099)  | 1.513(1.307)  | 0.073(0.062)          |                       |                       |  |
|                         |          |         | AMP-PNP   | 0.0680    | 0.073        | 0.792(0.101)  | 1.085(0.063)            |              | 1.877(0.037)  | 10.263(9.044) | 0.089(0.018)          |                       |                       |  |
| TD/GG                   | 38.3%    | Control | 0.1245    | 0.214     | 1.835(0.120) |               |                         | 1.835(0.057) | 0.458(0.087)  |               |                       |                       |                       |  |
|                         |          | AMP-PNP | 0.1239    | 0.552     | 2.306(.217)  |               |                         | 2.306(0.086) | 0.945(0.165)  |               |                       |                       |                       |  |
| SYIGEGAYGMVCSA          | 2P-WT    | 25.0%   | Control   | 0.1388    | 0.558        | 2.826(0.312)  | 2.992(0.207)            |              | 5.818(0.109)  | 7.677(4.214)  | 0.089(0.019)          |                       |                       |  |
|                         |          |         | AMP-PNP   | 0.2795    | 0.247        | 2.910(0.192)  | 2.427(0.128)            |              | 5.337(0.087)  | 4.051(0.761)  | 0.042(0.007)          |                       |                       |  |
|                         | 0P-WT    | 20.0%   | Control   | 0.3011    | 0.707        | 3.354(0.245)  | 2.450(0.295)            |              | 5.804(0.101)  | 6.465(2.303)  | 0.135(0.031)          |                       |                       |  |
|                         |          |         | AMP-PNP   | 0.0717    | 0.606        | 2.853(.204)   | 2.257(0.163)            |              | 5.110(0.117)  | 4.822(1.372)  | 0.033(0.008)          |                       |                       |  |
|                         | LM/GG    | 20.1%   | Control   | 0.0051    | 0.542        | 3.757(0.196)  | 2.645(0.175)            |              | 5.402(0.112)  | 5.387(1.305)  | 0.074(0.017)          |                       |                       |  |
|                         |          |         | AMP-PNP   | 0.0072    | 0.108        | 3.489(0.154)  | 1.997(0.183)            | 1.248(0.199) | 6.735(0.300)  | 6.664(1.115)  | 0.202(0.047)          | 0.008(0.006)          |                       |  |
|                         | ME/GG    | 19.8%   | Control   | 0.0709    | 0.989        | 3.777(0.354)  | 2.444(0.233)            |              | 6.220(0.184)  | 5.082(1.225)  | 0.038(0.013)          |                       |                       |  |
|                         |          |         | AMP-PNP   | 0.0065    | 0.064        | 2.858(0.124)  | 1.194(0.240)            | 1.780(0.200) | 5.831(0.299)  | 5.708(0.838)  | 0.149(0.057)          | 0.009(0.004)          |                       |  |
|                         | ET/GG    | 19.9%   | Control   | 0.0961    | 0.225        | 3.673(0.257)  | 1.161(0.243)            | 1.662(0.263) | 6.496(0.148)  | 5.521(0.853)  | 0.273(0.213)          | 0.016(0.007)          |                       |  |
|                         |          |         | AMP-PNP   | 0.0668    | 0.171        | 2.772(0.193)  | 1.397(0.322)            | 1.682(0.324) | 5.851(0.457)  | 6.626(1.439)  | 0.156(0.074)          | 0.008(0.006)          |                       |  |
|                         | TD/GG    | 19.8%   | Control   | 0.2459    | 0.788        | 4.033(0.295)  | 2.141(0.178)            |              | 6.174(0.115)  | 6.476(1.479)  | 0.073(0.019)          |                       |                       |  |
|                         |          |         | AMP-PNP   | 0.0281    | 0.242        | 3.060(0.176)  | 2.248(0.115)            |              | 5.308(0.089)  | 5.078(0.970)  | 0.040(0.007)          |                       |                       |  |
|                         | SAYDNL   | 2P-WT   | 21.2%     | Control   | 0.1470       | 0.104         | 0.316(0.150)            | 0.720(0.118) |               | 1.035(0.054)  | 1.749(1.648)          | 0.040(0.020)          |                       |  |
|                         |          |         |           | AMP-PNP   | 0.0323       | 0.010         | 0.409(0.045)            |              | 0.752(0.106)  | 1.161(0.117)  | 3.868(2.201)          |                       | 0.007(0.002)          |  |

|                          |             |         |        |              |              |              |              |              |              |              |
|--------------------------|-------------|---------|--------|--------------|--------------|--------------|--------------|--------------|--------------|--------------|
| NKVRVAIKKISPFHQTYCQRTLRE | 0P-WT 21.1% | Control | 0.1428 | 0.110        | 0.486(0.168) | 0.757(0.158) | 1.243(0.099) | 1.477(1.114) | 0.021(0.011) |              |
|                          |             | AMP-PNP | 0.1232 | 0.102        | 0.469(0.120) | 0.559(0.103) | 1.028(0.080) | 2.496(1.859) | 0.017(0.010) |              |
|                          | LM/GG 20.5% | Control | 0.0261 | 0.006        | 0.405(0.036) | 0.772(0.024) | 1.177(0.021) | 7.171(2.640) | 0.021(0.002) |              |
|                          |             | AMP-PNP | 0.1400 | 0.058        | 0.584(0.108) | 0.881(0.222) | 1.462(0.251) | 1.165(0.375) | 0.007(0.004) |              |
|                          | ME/GG 20.7% | Control | 0.0569 | 0.056        | 0.522(0.095) | 0.811(0.077) | 1.333(0.073) | 6.987(4.400) | 0.018(0.005) |              |
|                          |             | AMP-PNP | 0.1650 | 0.025        | 0.530(0.085) | 0.528(0.086) | 1.057(0.085) | 5.457(2.976) | 0.015(0.007) |              |
|                          | ET/GG 21.9% | Control | 0.0430 | 0.116        | 0.574(0.161) | 0.815(0.206) | 1.389(0.226) | 2.659(1.070) | 0.009(0.005) |              |
|                          |             | AMP-PNP | 0.0447 | 0.010        | 0.433(0.058) | 0.578(0.043) | 1.010(0.025) | 4.019(3.073) | 0.034(0.007) |              |
|                          | TD/GG 21.8% | Control | 0.0189 | 0.045        | 0.476(0.080) | 1.577(0.965) | 2.052(0.994) | 2.076(0.752) | 0.003(0.003) |              |
|                          |             | AMP-PNP | 0.0158 | 0.063        | 0.525(0.100) | 0.695(0.105) | 1.220(0.108) | 4.321(2.462) | 0.013(0.006) |              |
| IKILLRFRHENIIGIND        | 2P-WT 21.4% | Control | 0.1898 | 2.422        | 4.054(0.655) | 2.574(0.445) | 6.628(0.237) | 5.172(2.727) | 0.067(0.036) |              |
|                          |             | AMP-PNP | 0.2548 | 1.955        | 5.036(0.646) | 1.409(0.546) | 6.445(0.284) | 0.846(0.208) | 0.035(0.033) |              |
|                          | 0P-WT 21.0% | Control | 0.3271 | 0.697        | 5.481(0.260) | 1.729(0.255) | 7.210(0.228) | 1.865(0.194) | 0.017(0.008) |              |
|                          |             | AMP-PNP | 0.1989 | 1.743        | 5.228(0.366) | 2.437(0.728) | 7.664(0.822) | 1.357(0.186) | 0.008(0.007) |              |
|                          | LM/GG 21.4% | Control | 0.0573 | 0.833        | 4.525(0.283) | 3.129(0.261) | 7.654(0.144) | 3.670(0.788) | 0.061(0.016) |              |
|                          |             | AMP-PNP | 0.1926 | 3.519        | 5.782(0.856) | 1.831(0.707) | 7.612(0.295) | 1.396(0.387) | 0.027(0.027) |              |
|                          | ME/GG 21.2% | Control | 0.0533 | 0.043        | 3.178(0.151) | 3.373(0.137) | 1.749(0.454) | 8.299(0.548) | 5.162(0.643) | 0.268(0.036) |
|                          |             | AMP-PNP | 0.1004 | 0.219        | 5.261(0.214) | 2.180(0.292) | 7.441(0.315) | 1.843(0.156) | 0.011(0.004) |              |
|                          | ET/GG 20.4% | Control | 0.0466 | 0.727        | 3.790(0.360) | 3.203(0.262) | 6.993(0.104) | 5.237(1.235) | 0.212(0.045) |              |
|                          |             | AMP-PNP | 0.0767 | 1.137        | 3.874(0.505) | 2.822(0.415) | 6.696(0.278) | 2.596(0.781) | 0.021(0.009) |              |
| TD/GG 21.1%              | Control     | 0.1030  | 0.948  | 4.052(0.355) | 3.114(0.227) | 7.166(0.126) | 6.805(1.980) | 0.102(0.021) |              |              |
|                          | AMP-PNP     | 0.2186  | 1.359  | 3.925(0.558) | 3.230(0.480) | 7.155(0.170) | 3.105(1.183) | 0.138(0.040) |              |              |
| IIRAPTIEQMKD             | 2P-WT 20.6% | Control | 0.1039 | 0.324        | 1.588(0.190) | 1.884(0.150) | 3.443(0.142) | 1.203(0.272) | 0.015(0.004) |              |
|                          |             | AMP-PNP | 0.1087 | 0.305        | 1.359(0.203) | 1.400(0.154) | 2.759(0.111) | 1.124(0.304) | 0.027(0.009) |              |
|                          | 0P-WT 20.8% | Control | 0.1471 | 0.262        | 1.844(0.135) | 3.289(1.043) | 5.133(1.094) | 0.674(0.119) | 0.004(0.002) |              |
|                          |             | AMP-PNP | 0.1224 | 0.242        | 1.322(0.142) | 2.146(0.194) | 3.468(0.225) | 0.638(0.154) | 0.010(0.003) |              |
|                          | LM/GG 20.9% | Control | 0.1001 | 0.261        | 1.723(0.167) | 2.420(0.172) | 4.143(0.162) | 1.171(0.218) | 0.015(0.004) |              |
|                          |             | AMP-PNP | 0.0608 | 0.133        | 1.928(0.123) | 2.227(0.161) | 4.154(0.194) | 0.621(0.091) | 0.009(0.002) |              |
|                          | ME/GG 21.1% | Control | 0.1262 | 0.110        | 1.637(0.121) | 2.427(0.175) | 4.064(0.197) | 1.359(0.192) | 0.010(0.002) |              |
|                          |             | AMP-PNP | 0.1173 | 0.139        | 1.498(0.148) | 2.826(0.396) | 4.324(0.444) | 0.741(0.146) | 0.007(0.002) |              |
|                          | ET/GG 20.6% | Control | 0.0362 | 0.222        | 1.720(0.145) | 2.307(0.145) | 4.037(0.160) | 0.917(0.148) | 0.013(0.003) |              |
|                          |             | AMP-PNP | 0.0962 | 0.189        | 1.517(0.156) | 2.587(0.320) | 4.104(0.361) | 0.739(0.166) | 0.008(0.003) |              |
| TD/GG 20.3%              | Control     | 0.0921  | 0.392  | 1.661(0.207) | 2.281(0.173) | 3.942(0.172) | 1.353(0.316) | 0.015(0.004) |              |              |
|                          | AMP-PNP     | 0.0889  | 0.156  | 1.720(0.145) | 2.379(0.170) | 4.098(0.192) | 0.742(0.124) | 0.011(0.003) |              |              |
| IIRAPTIEQMKDVY           | 2P-WT 19.9% | Control | 0.2996 | 0.902        | 4.380(0.510) | 2.452(0.460) | 6.832(0.148) | 0.773(0.154) | 0.047(0.021) |              |
|                          |             | AMP-PNP | 0.0129 | 0.138        | 4.494(0.209) | 2.469(0.183) | 6.963(0.081) | 0.669(0.061) | 0.034(0.006) |              |
| 0P-WT 20.9%              | Control     | 0.1636  | 0.650  | 5.342(0.251) | 1.856(0.239) | 7.198(0.208) | 0.673(0.070) | 0.018(0.008) |              |              |
|                          | AMP-PNP     | 0.1804  | 0.621  | 5.033(0.256) | 2.189(0.221) | 7.222(0.157) | 0.788(0.077) | 0.019(0.006) |              |              |
| 0P-WT 20.2%              | Control     | 0.2807  | 0.893  | 4.687(0.407) | 2.316(0.345) | 7.003(0.143) | 0.833(0.132) | 0.043(0.017) |              |              |
|                          | AMP-PNP     | 0.0959  | 0.508  | 4.629(0.272) | 2.565(0.224) | 7.194(0.137) | 0.805(0.093) | 0.029(0.007) |              |              |
| 0P-WT 20.2%              | Control     | 0.2679  | 0.064  | 1.879(0.362) | 4.267(0.340) | 2.699(1.439) | 8.844(1.516) | 2.355(0.668) | 0.320(0.036) |              |
|                          | AMP-PNP     | 0.1551  | 0.722  | 5.018(0.282) | 2.285(0.243) | 7.304(0.159) | 0.816(0.086) | 0.021(0.007) |              |              |



|                       |       |       |         |        |       |              |              |              |              |              |              |              |
|-----------------------|-------|-------|---------|--------|-------|--------------|--------------|--------------|--------------|--------------|--------------|--------------|
|                       | LM/GG | 20.2% | Control | 0.1575 | 0.231 | 1.889(0.572) | 3.747(0.439) | 2.252(0.282) | 7.888(0.167) | 3.707(1.692) | 0.402(0.144) | 0.016(0.005) |
|                       |       |       | AMP-PNP | 0.0596 | 0.142 | 1.978(0.421) | 4.042(0.377) | 1.998(0.235) | 8.018(0.331) | 2.757(0.955) | 0.326(0.063) | 0.008(0.004) |
|                       | ME/GG | 20.1% | Control | 0.1254 | 0.151 | 1.537(0.367) | 4.330(0.280) | 2.327(0.653) | 8.194(0.771) | 4.538(1.734) | 0.379(0.080) | 0.006(0.004) |
|                       |       |       | AMP-PNP | 0.1212 | 0.207 | 2.049(0.627) | 3.612(0.527) | 2.296(0.581) | 7.966(0.726) | 2.897(1.312) | 0.364(0.124) | 0.007(0.005) |
|                       | ET/GG | 20.0% | Control | 0.0314 | 0.095 | 1.509(0.221) | 4.304(0.159) | 1.933(0.176) | 7.746(0.222) | 4.506(1.113) | 0.346(0.048) | 0.009(0.003) |
|                       |       |       | AMP-PNP | 0.1156 | 0.167 | 1.409(0.368) | 4.091(0.275) | 2.094(0.279) | 7.593(0.345) | 6.285(3.614) | 0.391(0.093) | 0.009(0.004) |
|                       | TD/GG | 19.5% | Control | 0.0704 | 0.884 | 5.365(0.323) | 1.947(0.259) |              | 7.312(0.217) | 0.826(0.095) | 0.018(0.009) |              |
|                       |       |       | AMP-PNP | 0.0851 | 0.634 | 5.213(0.325) | 2.051(0.265) |              | 7.264(0.193) | 0.758(0.088) | 0.021(0.009) |              |
| IVQDL                 | 2P-WT | 14.2% | Control | 0.0739 | 0.102 |              | 1.086(0.057) |              | 1.086(0.046) |              | 0.037(0.007) |              |
|                       |       |       | AMP-PNP | 0.0263 | 0.126 |              | 1.032(0.071) |              | 1.032(0.065) |              | 0.018(0.004) |              |
|                       | 0P-WT | 13.9% | Control | 0.0530 | 0.009 | 0.306(0.063) | 0.774(0.066) |              | 1.080(0.028) | 0.580(0.235) | 0.034(0.007) |              |
|                       |       |       | AMP-PNP | 0.0671 | 0.062 |              |              | 1.263(0.240) | 1.263(0.247) |              |              | 0.007(0.003) |
| IVQDG                 | LM/GG |       | Control |        |       |              |              |              |              |              |              |              |
|                       |       |       | AMP-PNP |        |       |              |              |              |              |              |              |              |
|                       | ME/GG |       | Control |        |       |              |              |              |              |              |              |              |
|                       |       |       | AMP-PNP |        |       |              |              |              |              |              |              |              |
|                       | ET/GG |       | Control |        |       |              |              |              |              |              |              |              |
|                       |       |       | AMP-PNP |        |       |              |              |              |              |              |              |              |
|                       | TD/GG | 19.6% | Control | 0.0330 | 0.026 | 0.141(0.017) |              |              | 1.122(0.028) | 1.122(0.038) |              |              |
|                       |       |       | AMP-PNP | 0.0054 | 0.005 | 0.187(0.045) | 0.947(0.076) |              | 1.134(0.089) | 1.191(0.512) | 0.183(0.005) |              |
| IVQDLME               | 2P-WT | 21.27 | Control | 0.2180 | 0.153 | 0.888(0.158) | 1.100(0.103) |              | 1.988(0.616) | 5.718(3.626) | 0.054(0.017) |              |
|                       |       |       | AMP-PNP | 0.1092 | 0.082 | 0.509(0.099) | 1.288(0.074) |              | 1.797(0.063) | 2.678(1.250) | 0.022(0.004) |              |
|                       | 0P-WT | 25.4% | Control | 0.0797 | 0.141 | 0.751(0.397) | 1.166(0.393) |              | 1.917(0.048) | 1.583(1.222) | 0.128(0.062) |              |
|                       |       |       | AMP-PNP | 0.1322 | 0.201 |              | 0.685(0.174) | 1.078(0.167) | 1.767(0.098) |              | 0.366(0.233) | 0.017(0.008) |
| METDL                 | 2P-WT | 19.3% | Control | 0.0951 | 0.038 |              | 0.895(0.041) |              | 0.895(0.029) |              | 0.097(0.015) |              |
|                       |       |       | AMP-PNP | 0.0312 | 0.021 | 0.524(0.046) |              |              | 0.524(0.024) |              | 0.564(0.145) |              |
|                       | 0P-WT | 14.2% | Control | 0.0521 | 0.034 | 0.412(0.069) | 0.523(0.062) |              | 0.935(0.038) | 2.353(0.955) | 0.033(0.012) |              |
|                       |       |       | AMP-PNP | 0.0319 | 0.050 | 0.532(0.044) |              |              | 0.532(0.02)  | 0.837(0.160) |              |              |
|                       | LM/GG |       | Control |        |       |              |              |              |              |              |              |              |
|                       |       |       | AMP-PNP |        |       |              |              |              |              |              |              |              |
| GGTDL <sup>(4)</sup>  | ME/GG | 24.7% | Control | 0.0586 | 0.048 | 1.355(0.077) | 0.318(0.093) |              | 1.673(0.099) | 2.794(0.362) | 0.012(0.010) |              |
|                       |       |       | AMP-PNP | 0.0895 | 0.046 | 1.121(0.082) | 0.324(0.098) |              | 1.445(0.106) | 1.810(0.269) | 0.011(0.010) |              |
|                       | ET/GG |       | Control |        |       |              |              |              |              |              |              |              |
|                       |       |       | AMP-PNP |        |       |              |              |              |              |              |              |              |
| LMEGGL <sup>(4)</sup> | TD/GG | 23.5% | Control | 0.1615 | 0.165 | 1.332(0.139) | 0.557(0.085) |              | 1.888(0.060) | 5.253(1.854) | 0.043(0.022) |              |
|                       |       |       | AMP-PNP | 0.0757 | 0.071 | 0.951(0.095) | 0.903(0.059) |              | 1.854(0.045) | 7.070(3.198) | 0.054(0.012) |              |
| IVQDLMETDL            | 2P-WT | 20.5% | Control | 0.2001 | 0.187 | 2.041(0.171) | 1.703(0.131) |              | 3.744(0.076) | 1.211(0.182) | 0.028(0.008) |              |
|                       |       |       | AMP-PNP | 0.1333 | 0.526 | 1.090(0.230) |              | 3.214(1.259) | 4.304(1.345) | 0.627(0.365) |              | 0.005(0.004) |
|                       | 0P-WT | 20.5% | Control | 0.1881 | 0.424 | 2.150(0.261) | 1.547(0.239) |              | 3.698(0.120) | 0.781(0.170) | 0.034(0.014) |              |
|                       |       |       | AMP-PNP | 0.1285 | 0.540 | 1.058(0.225) | 1.898(0.204) |              | 2.955(0.191) | 0.738(0.319) | 0.015(0.006) |              |
| IVQDGGETDL            | LM/GG | 21.0% | Control | 0.0358 | 0.319 | 2.196(0.220) | 1.133(0.200) |              | 3.329(0.145) | 1.824(0.391) | 0.021(0.011) |              |
|                       |       |       | AMP-PNP | 0.0998 | 0.115 | 1.360(0.306) | 1.136(0.235) | 0.727(0.157) | 3.222(0.116) | 4.631(1.988) | 0.372(0.259) | 0.014(0.010) |

|                  |             |         |        |       |              |              |              |              |               |              |
|------------------|-------------|---------|--------|-------|--------------|--------------|--------------|--------------|---------------|--------------|
| IVQDLGGTDL       | ME/GG 20.1% | Control | 0.0273 | 0.115 | 1.322(0.142) | 1.848(0.090) |              | 3.170(0.059) | 10.155(9.329) | 0.081(0.014) |
|                  |             | AMP-PNP | 0.0371 | 0.222 | 1.054(0.183) | 2.026(0.132) |              | 3.080(0.094) | 3.603(1.812)  | 0.035(0.007) |
| IVQDLMGGDL       | ET/GG 18.7% | Control | 0.1108 | 0.247 | 1.842(0.165) | 1.238(0.102) |              | 3.081(0.066) | 5.202(1.219)  | 0.059(0.016) |
|                  |             | AMP-PNP | 0.0779 | 0.103 | 1.594(0.114) | 1.392(0.096) |              | 2.986(0.093) | 3.733(0.618)  | 0.017(0.004) |
| IVQDLMEGGL       | TD/GG 16.7% | Control | 0.2113 | 0.356 | 2.417(0.210) | 1.435(0.154) |              | 3.853(0.079) | 3.390(0.704)  | 0.063(0.019) |
|                  |             | AMP-PNP | 0.0788 | 0.261 | 1.676(0.200) | 2.341(0.160) |              | 4.016(0.138) | 1.363(0.294)  | 0.019(0.004) |
| YKLLKTQHLSNDHICY | 2P-WT 23.3% | Control | 0.3159 | 0.817 | 1.747(0.333) | 1.160(0.215) |              | 2.907(0.116) | 7.246(6.296)  | 0.105(0.055) |
|                  |             | AMP-PNP | 0.3110 | 1.222 | 1.896(0.371) | 0.973(0.227) |              | 2.869(0.160) | 5.387(3.596)  | 0.054(0.038) |
|                  | 0P-WT 23.4% | Control | 0.0605 | 0.119 | 2.412(0.111) |              | 1.280(0.461) | 3.691(0.493) | 2.109(0.226)  | 0.006(0.004) |
|                  |             | AMP-PNP | 0.2519 | 0.824 | 1.877(0.270) | 1.158(0.254) |              | 3.035(0.238) | 3.092(1.342)  | 0.015(0.011) |
|                  | LM/GG 22.9% | Control | 0.2031 | 0.213 | 2.298(0.122) | 1.736(0.172) |              | 4.036(0.176) | 4.070(0.833)  | 0.013(0.004) |
|                  |             | AMP-PNP | 0.1522 | 0.397 | 2.505(0.209) |              | 1.334(0.409) | 3.840(0.463) | 2.332(0.443)  | 0.007(0.006) |
|                  | ME/GG 23.3% | Control | 0.1107 | 0.046 | 2.301(0.112) |              | 2.625(1.624) | 4.926(1.673) | 1.829(0.190)  | 0.003(0.003) |
|                  |             | AMP-PNP | 0.0735 | 0.184 | 1.940(0.156) |              | 2.679(1.393) | 4.619(1.423) | 3.851(0.884)  | 0.004(0.003) |
|                  | ET/GG 23.7% | Control | 0.1036 | 0.088 | 2.406(0.105) |              | 1.922(0.309) | 4.328(0.334) | 1.878(0.181)  | 0.007(0.002) |
|                  |             | AMP-PNP | 0.2231 | 0.329 | 2.267(0.200) |              | 1.866(0.650) | 4.133(0.682) | 3.428(0.678)  | 0.006(0.004) |
|                  | TD/GG 23.7% | Control | 0.0985 | 0.916 | 2.714(0.317) | 3.375(0.226) |              | 6.089(0.210) | 5.779(1.875)  | 0.022(0.005) |
|                  |             | AMP-PNP | 0.2716 | 1.014 | 2.828(0.382) | 3.177(0.318) |              | 6.005(0.289) | 3.561(1.358)  | 0.024(0.007) |
| ILRGLKYIHSANVL   | 2P-WT 20.8% | Control | 0.1343 | 0.356 | 1.541(0.203) | 0.994(0.149) |              | 2.525(0.123) | 1.188(0.289)  | 0.019(0.010) |
|                  |             | AMP-PNP | 0.1029 | 0.419 | 1.317(0.254) | 0.881(0.197) |              | 2.198(0.116) | 1.632(0.604)  | 0.037(0.022) |
|                  | 0P-WT 20.8% | Control | 0.1961 | 0.129 | 1.700(0.099) |              | 1.198(0.197) | 2.898(0.219) | 0.776(0.099)  | 0.009(0.004) |
|                  |             | AMP-PNP | 0.0993 | 0.212 | 1.168(0.136) | 1.459(0.148) |              | 2.627(0.162) | 0.711(0.175)  | 0.012(0.004) |
|                  | LM/GG 21.1% | Control | 0.1159 | 0.216 | 1.500(0.156) | 1.812(0.170) |              | 3.312(0.172) | 0.755(0.153)  | 0.014(0.004) |
|                  |             | AMP-PNP | 0.0380 | 0.091 | 1.570(0.112) | 1.400(0.099) |              | 2.970(0.115) | 0.677(0.104)  | 0.011(0.003) |
|                  | ME/GG 20.8% | Control | 0.1219 | 0.118 | 1.553(0.124) |              | 1.837(0.310) | 3.390(0.345) | 1.145(0.171)  | 0.007(0.003) |
|                  |             | AMP-PNP | 0.0427 | 0.060 | 1.269(0.094) |              | 1.738(0.131) | 3.007(0.155) | 0.600(0.098)  | 0.009(0.002) |
|                  | ET/GG 20.9% | Control | 0.1316 | 0.279 | 1.589(0.160) |              | 1.733(0.289) | 3.322(0.328) | 0.607(0.144)  | 0.009(0.004) |
|                  |             | AMP-PNP | 0.0968 | 0.145 | 1.380(0.142) |              | 1.596(0.216) | 2.977(0.252) | 0.482(0.133)  | 0.009(0.004) |
|                  | TD/GG 21.0% | Control | 0.1309 | 0.239 | 1.426(0.157) | 1.362(0.178) |              | 2.788(0.203) | 1.093(0.223)  | 0.012(0.005) |
|                  |             | AMP-PNP | 0.1113 | 0.096 | 1.574(0.109) |              | 1.473(0.228) | 3.046(0.258) | 0.657(0.098)  | 0.008(0.003) |
| HRDLKPSNL        | 2P-WT 22.2% | Control | 0.1473 | 0.152 | 0.507(0.123) |              |              | 0.507(0.040) | 1.164(0.485)  |              |
|                  |             | AMP-PNP | 0.0329 | 0.056 | 0.585(0.071) |              |              | 0.585(0.020) | 5.771(2.452)  |              |
|                  | 0P-WT 22.0% | Control | 0.1243 | 0.073 | 0.544(0.057) |              |              | 0.544(0.026) | 1.692(0.366)  |              |
|                  |             | AMP-PNP | 0.0461 | 0.153 | 0.535(0.080) |              |              | 0.535(0.034) | 2.056(0.664)  |              |
|                  | LM/GG 21.0% | Control | 0.0339 | 0.112 | 0.755(0.083) |              |              | 0.755(0.038) | 3.066(1.010)  |              |
|                  |             | AMP-PNP | 0.0460 | 0.135 | 0.838(0.113) |              |              | 0.838(0.038) | 2.573(0.722)  |              |
|                  | ME/GG 21.4% | Control | 0.1808 | 0.067 | 0.835(0.097) |              |              | 0.835(0.035) | 1.452(0.319)  |              |
|                  |             | AMP-PNP | 0.0086 | 0.013 | 0.735(0.044) |              |              | 0.735(0.018) | 1.682(0.223)  |              |
|                  | ET/GG 22.2% | Control | 0.0402 | 0.096 | 0.509(0.087) |              |              | 0.509(0.027) | 2.678(0.862)  |              |
|                  |             | AMP-PNP | 0.0396 | 0.081 | 0.525(0.083) |              |              | 0.525(0.032) | 1.494(0.433)  |              |
|                  | TD/GG 23.6% | Control | 0.0930 | 0.429 | 0.619(0.186) |              |              | 0.619(0.063) | 1.426(0.764)  |              |
|                  |             | AMP-PNP | 0.0473 | 0.283 | 0.641(0.157) |              |              | 0.641(0.051) | 2.915(1.565)  |              |

|                        |                                    |             |         |        |              |              |              |               |              |              |
|------------------------|------------------------------------|-------------|---------|--------|--------------|--------------|--------------|---------------|--------------|--------------|
| LLNTTCD <sup>(5)</sup> | 2P-WT 17.6%                        | Control     | 0.0874  | 0.077  | 1.874(0.110) | 0.532(0.070) | 2.405(0.042) | 5.776(1.225)  | 0.065(0.030) |              |
|                        |                                    | AMP-PNP     | 0.1253  | 0.127  | 1.338(0.157) | 0.707(0.109) | 2.046(0.046) | 10.172(9.595) | 0.158(0.095) |              |
|                        | 0P-WT 19.4%                        | Control     | 0.1506  | 0.099  | 1.913(0.179) | 0.492(0.147) | 2.405(0.077) | 2.468(0.512)  | 0.056(0.054) |              |
|                        |                                    | AMP-PNP     | 0.1464  | 0.104  | 1.638(0.197) | 0.618(0.160) | 2.255(0.057) | 1.645(0.387)  | 0.043(0.027) |              |
|                        | LM/GG 19.2%                        | Control     | 0.0075  |        |              |              |              |               |              |              |
|                        |                                    | AMP-PNP     | 0.1212  | 0.486  | 1.861(0.264) | 0.938(0.199) | 2.798(0.103) | 2.571(0.915)  | 0.028(0.015) |              |
|                        | ME/GG 19.1%                        | Control     | 0.0059  | 0.112  | 1.795(0.234) | 1.018(0.183) | 2.813(0.074) | 9.946(9.638)  | 0.238(0.111) |              |
|                        |                                    | AMP-PNP     |         | 0.120  | 1.792(0.206) | 0.953(0.157) | 2.745(0.089) | 5.579(2.219)  | 0.054(0.025) |              |
|                        | ET/GG 19.7%                        | Control     | 0.0871  | 0.047  | 1.870(0.076) | 0.974(0.054) | 2.844(0.050) | 5.627(0.811)  | 0.019(0.004) |              |
|                        |                                    | AMP-PNP     |         | 0.146  | 1.596(0.170) | 0.679(0.120) | 2.275(0.080) | 4.362(1.108)  | 0.029(0.016) |              |
|                        | TD/GG 19.3%                        | Control     | 0.1400  | 0.218  | 1.989(0.260) | 0.805(0.197) | 2.794(0.091) | 4.296(3.721)  | 0.035(0.022) |              |
|                        |                                    | AMP-PNP     | 0.2012  | 0.337  | 1.690(0.232) | 0.806(0.197) | 2.495(0.184) | 4.156(1.716)  | 0.025(0.019) |              |
|                        | LNTTCDL                            | 2P-WT 20.6% | Control | 0.0617 | 0.058        | 1.906(0.090) | 0.537(0.058) | 2.444(0.048)  | 5.113(0.794) | 0.023(0.011) |
|                        |                                    |             | AMP-PNP | 0.0815 | 0.082        | 1.511(0.099) | 0.684(0.063) | 2.195(0.048)  | 5.613(1.295) | 0.046(0.013) |
|                        | 0P-WT 22.3%                        | Control     | 0.1263  | 0.200  | 1.849(0.112) | 0.804(0.180) | 2.652(0.191) | 3.547(0.690)  | 0.011(0.007) |              |
|                        |                                    | AMP-PNP     | 0.0335  | 0.117  | 1.704(0.112) | 0.636(0.093) | 2.340(0.076) | 1.711(0.239)  | 0.017(0.009) |              |
|                        | LKICDFGL                           | 2P-WT 22.3% | Control | 0.1150 | 0.128        | 0.376(0.122) | 1.739(0.091) | 2.115(0.073)  | 1.057(0.647) | 0.019(0.004) |
|                        |                                    |             | AMP-PNP | 0.1006 | 0.285        | 0.899(0.103) |              | 0.899(0.094)  | 0.028(0.010) |              |
| 0P-WT 23.0%            |                                    | Control     | 0.0944  | 0.214  | 0.894(0.142) | 1.376(0.143) | 2.270(0.135) | 0.632(0.231)  | 0.016(0.006) |              |
|                        |                                    | AMP-PNP     | 0.0388  | 0.084  | 0.362(0.078) | 1.438(0.180) | 1.800(0.201) | 1.937(0.933)  | 0.008(0.003) |              |
| LM/GG 22.4%            |                                    | Control     | 0.0626  | 0.571  | 1.020(0.288) | 1.519(0.272) | 2.536(0.187) | 0.684(0.361)  | 0.020(0.010) |              |
|                        |                                    | AMP-PNP     | 0.0416  | 0.108  | 0.880(0.119) | 1.531(0.088) | 2.412(0.058) | 1.152(0.275)  | 0.018(0.003) |              |
| ME/GG 22.4%            |                                    | Control     | 0.1133  | 0.12   | 0.676(0.132) | 1.865(0.110) | 2.540(0.077) | 2.128(0.930)  | 0.024(0.004) |              |
|                        |                                    | AMP-PNP     | 0.0122  | 0.764  | 1.573(0.199) |              | 1.573(0.179) | 0.027(0.012)  |              |              |
| ET/GG 23.2%            |                                    | Control     | 0.1511  | 0.247  | 0.861(0.141) | 1.480(0.115) | 2.341(0.110) | 0.676(0.239)  | 0.013(0.004) |              |
|                        |                                    | AMP-PNP     | 0.0725  | 0.056  | 0.374(0.088) | 1.415(0.072) | 1.788(0.070) | 5.962(4.027)  | 0.017(0.003) |              |
| TD/GG 23.1%            |                                    | Control     | 0.1517  | 0.09   | 0.911(0.124) | 1.582(0.103) | 2.493(0.049) | 1.120(0.275)  | 0.031(0.006) |              |
|                        |                                    | AMP-PNP     | 0.0286  | 0.071  | 0.633(0.099) | 1.587(0.077) | 2.219(0.064) | 2.584(1.005)  | 0.021(0.003) |              |
| KICDFGL                |                                    | 2P-WT 24.4% | Control | 0.0467 | 0.055        |              | 1.203 (.050) | 1.203 (.048)  |              | 0.023 (.003) |
|                        |                                    |             | AMP-PNP | 0.0415 | 0.146        |              | 0.534 (.061) | 0.534 (.061)  |              | 0.033 (.013) |
|                        |                                    | 0P-WT 20.5% | Control | 0.1171 | 0.093        | 0.689 (.086) | 0.774 (.118) | 1.463 (.129)  | 0.903 (.228) | 0.012 (.005) |
|                        |                                    |             | AMP-PNP | 0.0993 | 0.057        | 0.404 (.065) | 0.083 (.082) | 1.239 (.091)  | 2.317 (.916) | 0.011 (.004) |
|                        |                                    | LM/GG 25.9% | Control | 0.0223 | 0.02         | 0.748 (.080) | 0.498 (.070) | 1.246 (.072)  | 0.261 (.058) | 0.012 (.006) |
|                        |                                    |             | AMP-PNP | 0.0432 | 0.151        | 0.551 (.135) | 0.787 (.105) | 1.338 (.075)  | 0.971 (.443) | 0.017 (.007) |
|                        | ME/GG 23.8%                        | Control     | 0.0880  | 0.07   | 0.488 (.113) | 0.897 (.097) | 1.385 (.055) | 1.408 (.623)  | 0.028 (.008) |              |
|                        |                                    | AMP-PNP     | 0.0390  | 0.035  |              | 0.886 (.067) | 0.886 (.068) |               | 0.013 (.003) |              |
|                        | ET/GG 21.8%                        | Control     | 0.1087  | 0.137  | 0.428 (.120) | 1.009 (.080) | 1.436 (.046) | 3.556 (2.363) | 0.044 (.011) |              |
|                        |                                    | AMP-PNP     | 0.0211  | 0.032  | 0.254 (.064) | 0.841 (.056) | 1.095 (.056) | 4.631 (2.828) | 0.016 (.003) |              |
|                        | TD/GG 21.2%                        | Control     | 0.0622  | 0.08   | 0.840 (.106) | 0.763 (.087) | 1.603 (.060) | 1.475 (.356)  | 0.025 (.009) |              |
|                        |                                    | AMP-PNP     | 0.0668  | 0.031  | 0.477 (.076) | 0.833 (.064) | 1.310 (.055) | 1.353 (.394)  | 0.017 (.004) |              |
|                        | KICDFGLARVADPDHDTGF <sup>(3)</sup> | 2P-WT       | Control |        |              |              |              |               |              |              |
|                        |                                    |             | AMP-PNP |        |              |              |              |               |              |              |

|                                        |                       |             |         |              |              |              |              |              |               |              |              |  |
|----------------------------------------|-----------------------|-------------|---------|--------------|--------------|--------------|--------------|--------------|---------------|--------------|--------------|--|
| ARVADPDHDTGFLpTEpYVATRW <sup>(3)</sup> | 0P-WT 20.0%           | Control     | 0.0334  | 1.628        | 4.107(0.560) | 2.662(0.536) |              | 6.770(0.202) | 0.586(0.153)  | 0.036(0.017) |              |  |
|                                        |                       | AMP-PNP     | 0.0864  | 1.429        | 2.239(0.485) | 3.584(0.430) |              | 5.822(0.223) | 1.237(0.470)  | 0.033(0.011) |              |  |
|                                        | LM/GG 20.1%           | Control     | 0.0863  | 0.177        | 1.342(0.272) | 3.744(0.276) | 2.476(0.336) | 7.452(0.113) | 7.775(6.311)  | 0.345(0.096) | 0.022(0.006) |  |
|                                        |                       | AMP-PNP     | 0.0737  | 0.1          | 1.202(0.166) | 4.716(0.154) | 2.850(1.609) | 8.768(1.718) | 6.904(3.640)  | 0.235(0.023) | 0.004(0.003) |  |
|                                        | ME/GG 20.1%           | Control     | 0.0753  | 1.113        | 3.613(0.493) | 3.600(0.441) |              | 7.213(0.221) | 0.766(0.189)  | 0.028(0.009) |              |  |
|                                        |                       | AMP-PNP     | 0.0731  | 0.885        | 2.017(0.418) | 4.163(0.343) |              | 6.180(0.234) | 1.478(0.581)  | 0.022(0.005) |              |  |
|                                        | ET/GG 19.8%           | Control     | 0.1476  | 0.95         | 4.228(0.375) | 2.879(0.316) |              | 7.107(0.146) | 0.699(0.116)  | 0.028(0.008) |              |  |
|                                        |                       | AMP-PNP     | 0.1139  | 1.297        | 2.680(0.506) | 3.715(0.423) |              | 6.395(0.233) | 1.025(0.353)  | 0.028(0.009) |              |  |
|                                        | TD/GG 19.9%           | Control     | 0.1023  | 1.482        | 4.479(0.683) | 2.602(0.634) |              | 7.080(0.172) | 0.803(0.188)  | 0.049(0.025) |              |  |
|                                        |                       | AMP-PNP     | 0.1861  | 0.981        | 3.106(0.490) | 3.666(0.415) |              | 6.772(0.191) | 0.859(0.223)  | 0.035(0.010) |              |  |
|                                        | YVATRW <sup>(3)</sup> | 2P-WT 20.5% | Control | 0.1376       | 1.323        | 6.313(0.457) | 1.498(0.298) |              | 7.811(0.185)  | 3.342(0.973) | 0.026(0.021) |  |
|                                        |                       |             | AMP-PNP | 0.0234       | 1.903        | 6.088(0.473) | 1.814(0.297) |              | 7.902(0.229)  | 6.597(0.473) | 1.814(0.297) |  |
| VATRW <sup>(3)</sup>                   | 2P-WT                 | Control     |         |              |              |              |              |              |               |              |              |  |
|                                        |                       | AMP-PNP     |         |              |              |              |              |              |               |              |              |  |
|                                        | 0P-WT 26.5%           | Control     | 0.2188  | 0.356        | 3.513(0.121) |              |              | 3.513(0.044) | 7.662(1.810)  |              |              |  |
|                                        |                       | AMP-PNP     | 0.2393  | 1.426        | 3.720(0.243) |              |              | 3.720(0.092) | 5.189(1.421)  |              |              |  |
|                                        | LM/GG 21.1%           | Control     | 0.0394  | 0.593        | 3.814(0.147) |              |              | 3.814(0.072) | 5.755(1.211)  |              |              |  |
|                                        |                       | AMP-PNP     | 0.0557  | 1.186        | 3.941(0.311) |              |              | 3.941(0.088) | 4.029(0.841)  |              |              |  |
|                                        | ME/GG 20.1%           | Control     | 0.0587  | 0.226        | 3.400(0.150) |              |              | 3.400(0.043) | 10.792(3.551) |              |              |  |
|                                        |                       | AMP-PNP     | 0.1558  | 0.698        | 3.551(0.262) |              |              | 3.551(0.077) | 5.616(1.433)  |              |              |  |
|                                        | ET/GG 19.6%           | Control     | 0.2528  | 1.185        | 3.494(0.313) |              |              | 3.494(0.088) | 5.358(1.193)  |              |              |  |
|                                        |                       | AMP-PNP     | 0.0173  | 0.291        | 3.556(0.190) |              |              | 3.556(0.060) | 8.340(1.902)  |              |              |  |
|                                        | TD/GG 19.8%           | Control     | 0.1760  | 0.945        | 3.432(0.269) |              |              | 3.432(0.073) | 5.430(1.063)  |              |              |  |
|                                        |                       | AMP-PNP     | 0.1664  | 0.856        | 3.264(0.277) |              |              | 3.264(0.079) | 4.923(1.285)  |              |              |  |
| YRAPEIM                                | 2P-WT                 | Control     |         |              |              |              |              |              |               |              |              |  |
|                                        |                       | AMP-PNP     |         |              |              |              |              |              |               |              |              |  |
|                                        | 0P-WT 29.0%           | Control     | 0.1272  | 0.094        | 3.021(0.101) |              |              | 3.021(0.030) | 7.130(1.084)  |              |              |  |
|                                        |                       | AMP-PNP     | 0.1794  | 0.213        | 3.062(0.133) |              |              | 3.062(0.035) | 7.838(1.774)  |              |              |  |
|                                        | 2P-WT 22.2%           | Control     | 0.0791  | 0.051        | 0.296(0.088) | 1.413(0.067) |              | 1.710(0.042) | 1.165(0.631)  | 0.024(0.004) |              |  |
|                                        |                       | AMP-PNP     | 0.0651  | 0.061        | 0.269(0.089) | 1.545(0.063) |              | 1.814(0.055) | 3.890(3.551)  | 0.023(0.003) |              |  |
|                                        | 0P-WT 24.8%           | Control     | 0.2004  | 0.095        | 0.646(0.116) | 1.807(0.109) |              | 2.453(0.070) | 0.674(0.267)  | 0.024(0.004) |              |  |
|                                        |                       | AMP-PNP     | 0.1182  | 0.148        | 0.685(0.132) | 1.842(0.113) |              | 2.528(0.067) | 0.954(0.329)  | 0.023(0.004) |              |  |
|                                        | LM/GG 21.2%           | Control     | 0.0532  | 0.061        | 0.520(0.080) | 1.734(0.069) |              | 2.254(0.054) | 7.058(6.187)  | 0.031(0.004) |              |  |
|                                        |                       | AMP-PNP     | 0.0869  | 0.084        | 0.815(0.122) | 1.557(0.094) |              | 2.372(0.063) | 0.955(0.262)  | 0.017(0.003) |              |  |
|                                        | ME/GG 24.8%           | Control     | 0.1804  | 0.204        | 0.578(0.185) | 1.766(0.159) |              | 2.344(0.110) | 1.123(0.657)  | 0.021(0.006) |              |  |
|                                        |                       | AMP-PNP     | 0.0872  | 0.183        | 0.738(0.191) | 1.594(0.162) |              | 2.332(0.124) | 0.826(0.389)  | 0.018(0.006) |              |  |
| ET/GG 25.7%                            | Control               | 0.0855      | 0.15    | 0.691(0.127) | 1.737(0.104) |              | 2.428(0.085) | 0.612(0.246) | 0.018(0.004)  |              |              |  |
|                                        | AMP-PNP               | 0.0613      | 0.063   | 0.728(0.125) | 1.748(0.120) |              | 2.476(0.959) | 0.384(0.169) | 0.015(0.003)  |              |              |  |
| TD/GG 25.6%                            | Control               | 0.0792      | 0.258   | 0.704(0.186) | 1.725(0.152) |              | 2.428(0.095) | 0.760(0.382) | 0.023(0.006)  |              |              |  |
|                                        | AMP-PNP               | 0.0794      | 0.069   | 0.796(0.119) | 1.797(0.107) |              | 2.593(0.079) | 0.616(0.184) | 0.024(0.004)  |              |              |  |
| NSKGYTKSIDIWSVG                        | 2P-WT 21.1%           | Control     | 0.1536  | 0.368        | 2.906(0.306) | 1.308(0.251) |              | 4.214(0.088) | 3.504(0.977)  | 0.096(0.043) |              |  |
|                                        |                       | AMP-PNP     | 0.3429  | 0.754        | 3.352(0.344) | 0.981(0.251) |              | 4.334(0.203) | 2.684(0.651)  | 0.024(0.021) |              |  |

|                                |       |       |         |        |       |              |              |               |               |                |              |              |
|--------------------------------|-------|-------|---------|--------|-------|--------------|--------------|---------------|---------------|----------------|--------------|--------------|
|                                | 0P-WT | 24.2% | Control | 0.0832 | 0.784 | 3.958(0.331) | 2.289(0.419) | 6.247(0.447)  | 3.685(0.801)  | 0.011(0.006)   |              |              |
|                                |       |       | AMP-PNP | 0.1908 | 0.346 | 3.636(0.217) | 2.188(0.162) | 5.823(0.154)  | 7.719(2.364)  | 0.020(0.005)   |              |              |
|                                | LM/GG | 24.5% | Control | 0.1397 | 0.238 | 3.967(0.130) | 2.231(0.128) | 6.198(0.109)  | 5.792(0.977)  | 0.027(0.007)   |              |              |
|                                |       |       | AMP-PNP | 0.1631 | 0.473 | 3.874(0.232) | 2.291(0.176) | 6.165(0.175)  | 4.719(0.887)  | 0.014(0.004)   |              |              |
|                                | ME/GG | 24.0% | Control | 0.1398 | 0.45  | 3.845(0.230) | 2.790(0.520) | 6.635(0.541)  | 5.922(1.002)  | 0.008(0.003)   |              |              |
|                                |       |       | AMP-PNP | 0.1042 | 0.208 | 3.840(0.165) | 3.238(0.510) | 7.079(0.530)  | 4.890(0.677)  | 0.007(0.002)   |              |              |
|                                | ET/GG | 24.7% | Control | 0.0363 | 0.576 | 3.868(0.306) | 2.648(0.233) | 6.516(0.225)  | 4.391(1.050)  | 0.019(0.007)   |              |              |
|                                |       |       | AMP-PNP | 0.0954 | 0.275 | 3.726(0.196) | 3.593(0.520) | 7.318(0.545)  | 5.987(0.904)  | 0.007(0.002)   |              |              |
|                                | TD/GG | 24.3% | Control | 0.1055 | 0.349 | 3.928(0.254) | 1.840(0.183) | 5.768(0.161)  | 11.358(8.529) | 0.023(0.007)   |              |              |
|                                |       |       | AMP-PNP | 0.1503 | 0.581 | 4.527(0.370) | 1.847(0.559) | 6.374(0.615)  | 1.968(0.349)  | 0.009(0.008)   |              |              |
| LSNRPIFPKGKHYLDQLNHILGILGSPSQE | 2P-WT | 24.5% | Control | 0.2266 | 1.816 | 5.647(0.692) | 3.512(0.534) | 9.159(0.324)  | 2.907(0.931)  | 0.053(0.025)   |              |              |
|                                |       |       | AMP-PNP | 0.1988 | 1.593 | 5.989(0.628) | 2.836(0.470) | 8.825(0.241)  | 1.359(0.260)  | 0.042(0.017)   |              |              |
|                                | 0P-WT | 24.4% | Control | 0.1827 | 2.839 | 5.008(0.643) | 4.523(0.450) | 9.531(0.218)  | 4.689(1.877)  | 0.103(0.029)   |              |              |
|                                |       |       | AMP-PNP | 0.1789 | 2.378 | 6.636(0.456) | 4.520(0.523) | 11.156(0.552) | 1.840(0.274)  | 0.012(0.005)   |              |              |
|                                | LM/GG | 24.0% | Control | 0.0689 | 0.215 | 4.635(0.312) | 3.216(0.255) | 4.749(0.354)  | 12.601(0.462) | 7.592(1.977)   | 0.355(0.111) | 0.009(0.002) |
|                                |       |       | AMP-PNP | 0.1336 | 0.408 | 5.163(0.336) | 3.261(0.552) | 3.100(0.357)  | 11.524(0.403) | 4.865(0.906)   | 0.189(0.067) | 0.012(0.007) |
|                                | ME/GG | 24.0% | Control | 0.1169 | 0.078 | 4.864(0.153) | 3.838(0.194) | 6.867(4.892)  | 15.568(5.050) | 6.106(0.684)   | 0.164(0.020) | 0.002(0.002) |
|                                |       |       | AMP-PNP | 0.0543 | 2.625 | 5.774(0.603) | 5.818(0.423) | 11.592(0.360) | 4.888(1.654)  | 0.026(0.006)   |              |              |
|                                | ET/GG | 24.6% | Control | 0.0546 | 1.279 | 4.541(0.484) | 2.833(1.153) | 2.948(1.210)  | 10.322(0.256) | 9.361(5.142)   | 0.205(0.169) | 0.022(0.014) |
|                                |       |       | AMP-PNP | 0.3628 | 0.658 | 4.591(0.519) | 2.459(1.027) | 3.246(1.119)  | 10.296(0.257) | 5.510(1.446)   | 0.232(0.216) | 0.022(0.012) |
|                                | TD/GG | 25.2% | Control | 0.0893 | 1.46  | 5.338(0.490) | 5.212(0.349) | 10.550(0.211) | 3.834(1.038)  | 0.061(0.013)   |              |              |
|                                |       |       | AMP-PNP | 0.2293 | 2.366 | 5.646(0.570) | 5.406(0.370) | 11.051(0.243) | 5.295(1.813)  | 0.075(0.015)   |              |              |
| IINLKARNYL                     | 2P-WT | 19.8% | Control | 0.1557 | 0.719 | 3.826(0.390) | 2.532(0.325) | 6.358(0.106)  | 3.609(0.981)  | 0.158(0.038)   |              |              |
|                                |       |       | AMP-PNP | 0.2149 | 0.849 | 4.728(0.384) | 1.654(0.297) | 6.382(0.174)  | 1.847(0.305)  | 0.047(0.023)   |              |              |
|                                | 0P-WT | 20.9% | Control | 0.2754 | 1.42  | 5.120(0.404) | 1.443(0.343) | 6.563(0.198)  | 1.288(0.185)  | 0.031(0.023)   |              |              |
|                                |       |       | AMP-PNP | 0.2744 | 0.871 | 3.582(0.384) | 2.801(0.357) | 6.382(0.115)  | 3.043(0.893)  | 0.108(0.027)   |              |              |
|                                | LM/GG | 20.8% | Control | 0.1273 | 0.172 | 2.683(0.281) | 2.853(0.258) | 1.299(0.299)  | 6.835(0.122)  | 6.810(2.308)   | 0.349(0.124) | 0.019(0.010) |
|                                |       |       | AMP-PNP | 0.0496 | 1.482 | 4.810(0.576) | 1.729(0.495) | 6.539(0.164)  | 1.426(0.317)  | 0.042(0.024)   |              |              |
|                                | ME/GG | 21.1% | Control | 0.0520 | 0.037 | 2.271(0.189) | 3.235(0.142) | 1.328(0.105)  | 6.834(0.120)  | 12.482(9.357)  | 0.449(0.067) | 0.011(0.003) |
|                                |       |       | AMP-PNP | 0.0959 | 0.122 | 2.857(0.271) | 2.508(0.254) | 1.389(0.282)  | 6.755(0.139)  | 5.614(1.331)   | 0.307(0.114) | 0.017(0.008) |
|                                | ET/GG | 21.1% | Control | 0.0200 | 0.118 | 2.549(0.191) | 3.140(0.135) | 1.132(0.254)  | 6.821(0.319)  | 7.710(1.882)   | 0.315(0.058) | 0.008(0.005) |
|                                |       |       | AMP-PNP | 0.2337 | 0.208 | 2.654(0.332) | 2.833(0.255) | 1.474(0.410)  | 6.961(0.516)  | 7.206(2.579)   | 0.341(0.116) | 0.008(0.006) |
|                                | TD/GG | 20.3% | Control | 0.1018 | 0.105 | 2.438(0.277) | 2.939(0.202) | 1.249(0.161)  | 6.626(0.080)  | 11.882(11.814) | 0.420(0.108) | 0.020(0.007) |
|                                |       |       | AMP-PNP | 0.1659 | 0.206 | 2.595(0.420) | 2.868(0.307) | 1.171(0.316)  | 6.634(0.197)  | 7.976(4.842)   | 0.329(0.147) | 0.016(0.012) |
| LSLPHKNKVPWNRLFPNADSKALDL      | 2P-WT | 23.2% | Control | 0.0590 | 2.34  | 5.628(0.514) | 3.398(0.324) | 9.025(0.261)  | 4.439(1.212)  | 0.026(0.009)   |              |              |
|                                |       |       | AMP-PNP | 0.4213 | 1.699 | 5.901(0.464) | 3.455(0.337) | 9.357(0.283)  | 4.208(0.970)  | 0.023(0.007)   |              |              |
|                                | 0P-WT | 22.9% | Control | 0.2494 | 0.688 | 5.209(0.391) | 1.487(0.564) | 4.281(1.495)  | 10.977(1.846) | 5.557(1.507)   | 0.225(0.181) | 0.006(0.005) |
|                                |       |       | AMP-PNP | 0.2633 | 2.229 | 5.927(0.390) | 3.944(0.423) | 9.871(0.432)  | 4.572(1.167)  | 0.013(0.005)   |              |              |
|                                | LM/GG | 24.3% | Control | 0.1344 | 0.808 | 5.862(0.219) | 4.667(0.268) | 10.528(0.260) | 4.113(0.611)  | 0.016(0.003)   |              |              |
|                                |       |       | AMP-PNP | 0.0311 | 0.406 | 5.244(0.313) | 1.948(0.317) | 4.179(1.509)  | 11.371(1.726) | 5.131(0.906)   | 0.212(0.088) | 0.005(0.003) |
|                                | ME/GG | 24.3% | Control | 0.1214 | 1.744 | 5.326(0.456) | 4.743(0.592) | 10.069(0.616) | 5.109(1.115)  | 0.011(0.004)   |              |              |
|                                |       |       | AMP-PNP | 0.1956 | 0.927 | 5.675(0.351) | 5.433(0.976) | 11.108(1.020) | 4.530(0.862)  | 0.007(0.003)   |              |              |

|                     |             |         |        |              |              |              |              |               |               |              |              |
|---------------------|-------------|---------|--------|--------------|--------------|--------------|--------------|---------------|---------------|--------------|--------------|
| LTFNPHKRIEVEQA      | ET/GG 24.4% | Control | 0.2261 | 0.974        | 5.717(0.299) | 3.907(0.233) |              | 9.623(0.235)  | 4.331(0.536)  | 0.016(0.003) |              |
|                     |             | AMP-PNP | 0.2244 | 1.607        | 5.352(0.447) | 4.471(0.430) |              | 9.822(0.436)  | 4.702(0.962)  | 0.014(0.004) |              |
|                     | TD/GG 23.9% | Control | 0.0822 | 2.312        | 5.585(0.512) | 3.897(0.330) |              | 9.482(0.268)  | 4.437(1.249)  | 0.025(0.008) |              |
|                     |             | AMP-PNP | 0.1988 | 2.215        | 5.524(0.531) | 3.795(0.334) |              | 9.319(0.257)  | 6.449(2.509)  | 0.047(0.014) |              |
|                     | 2P-WT 30.5% | Control | 0.1828 | 0.929        | 2.506(0.607) | 1.881(0.538) |              | 4.386(0.194)  | 0.948(0.403)  | 0.033(0.024) |              |
|                     |             | AMP-PNP | 0.0703 | 1.828        | 2.051(0.465) | 3.457(0.310) |              | 5.508(0.241)  | 4.489(3.093)  | 0.035(0.009) |              |
|                     | 0P-WT 27.5% | Control | 0.0617 | 1.648        | 2.643(0.528) | 2.213(0.475) |              | 4.856(0.180)  | 1.828(0.733)  | 0.053(0.030) |              |
|                     |             | AMP-PNP | 0.1710 | 3.755        | 2.454(0.820) | 2.759(0.743) |              | 5.214(0.280)  | 1.512(0.938)  | 0.042(0.028) |              |
|                     | LM/GG 23.4% | Control | 0.2700 | 0.887        | 2.150(0.359) | 2.979(0.326) |              | 5.129(0.160)  | 7.649(7.566)  | 0.096(0.030) |              |
|                     |             | AMP-PNP | 0.1435 | 0.325        | 2.722(0.336) | 2.767(0.276) |              | 5.490(0.101)  | 1.013(0.211)  | 0.036(0.007) |              |
|                     | ME/GG 26.1% | Control | 0.2625 | 1.357        | 2.328(0.455) | 2.649(0.293) |              | 4.976(0.203)  | 6.635(4.192)  | 0.060(0.024) |              |
|                     |             | AMP-PNP | 0.1328 | 0.513        | 1.993(0.293) | 2.824(0.185) |              | 4.817(0.134)  | 9.007(8.822)  | 0.058(0.014) |              |
| YYDPSDEPIAEAPFKDMEL | ET/GG 30.2% | Control | 0.2974 | 1.096        | 2.356(0.424) | 2.526(0.341) |              | 4.872(0.187)  | 1.267(0.421)  | 0.030(0.012) |              |
|                     |             | AMP-PNP | 0.1659 | 0.977        | 2.920(0.382) | 2.326(0.331) |              | 5.247(0.302)  | 1.313(0.330)  | 0.016(0.008) |              |
|                     | TD/GG 31.5% | Control | 0.2489 | 3.237        | 1.876(0.689) | 3.105(0.502) |              | 4.981(0.315)  | 3.541(3.048)  | 0.046(0.022) |              |
|                     |             | AMP-PNP | 0.0668 | 0.718        | 1.733(0.310) | 3.332(0.198) |              | 5.065(0.136)  | 5.708(3.669)  | 0.068(0.013) |              |
|                     | 2P-WT 22.4% | Control | 0.0875 | 2.247        | 6.948(0.54)  | 2.561(0.361) |              | 9.509(0.165)  | 9.048(4.619)  | 0.177(0.061) |              |
|                     |             | AMP-PNP | 0.4553 | 0.523        | 7.144(0.401) | 2.533(0.195) |              | 9.677(0.151)  | 6.754(1.530)  | 0.152(0.050) |              |
|                     | 0P-WT 22.0% | Control | 0.0434 | 0.901        | 7.089(0.331) | 2.769(0.276) |              | 9.858(0.117)  | 7.701(1.986)  | 0.246(0.066) |              |
|                     |             | AMP-PNP | 0.0707 | 0.757        | 8.948(0.382) | 1.134(0.341) |              | 10.083(0.255) | 2.111(0.242)  | 0.027(0.025) |              |
|                     | LM/GG 22.2% | Control | 0.2549 | 0.42         | 7.402(0.261) | 2.992(0.233) |              | 10.394(0.095) | 13.013(8.691) | 0.246(0.056) |              |
|                     |             | AMP-PNP | 0.2381 | 0.479        | 7.052(0.350) | 3.100(0.277) |              | 10.152(0.077) | 8.542(2.145)  | 0.282(0.073) |              |
|                     | ME/GG 21.4% | Control | 0.1089 | 0.114        | 7.460(0.150) | 2.230(0.099) |              | 9.689(0.055)  | 7.215(0.636)  | 0.147(0.028) |              |
|                     |             | AMP-PNP | 0.0983 | 0.35         | 7.317(0.236) | 2.397(0.150) |              | 9.714(0.092)  | 7.730(1.242)  | 0.118(0.026) |              |
| ET/GG 21.3%         | Control     | 0.0915  | 0.644  | 7.374(0.295) | 2.555(0.186) |              | 9.929(0.088) | 8.780(1.648)  | 0.185(0.049)  |              |              |
|                     | AMP-PNP     | 0.3386  | 0.824  | 7.082(0.395) | 2.608(0.273) |              | 9.690(0.126) | 11.350(5.526) | 0.144(0.061)  |              |              |
| DDLPEKELKELIF       | TD/GG 21.0% | Control | 0.1269 | 0.196        | 7.538(0.204) | 2.356(0.134) |              | 9.894(0.088)  | 9.265(1.701)  | 0.132(0.032) |              |
|                     |             | AMP-PNP | 0.3056 | 0.46         | 7.203(0.297) | 2.816(0.192) |              | 10.019(0.110) | 12.328(7.092) | 0.149(0.044) |              |
|                     | 2P-WT 19.1% | Control | 0.2048 | 0.223        | 1.978(0.175) | 1.697(0.127) |              | 3.675(0.075)  | 1.801(0.313)  | 0.033(0.008) |              |
|                     |             | AMP-PNP | 0.0402 | 0.187        | 1.925(0.147) | 1.607(0.101) |              | 3.531(0.072)  | 3.215(0.648)  | 0.036(0.007) |              |
|                     | 0P-WT 19.2% | Control | 0.1240 | 0.315        | 2.607(0.169) | 1.334(0.147) |              | 3.941(0.119)  | 1.483(0.189)  | 0.021(0.008) |              |
|                     |             | AMP-PNP | 0.0222 | 0.43         | 1.650(0.173) | 1.894(0.132) |              | 3.544(0.085)  | 7.176(4.418)  | 0.073(0.016) |              |
|                     | LM/GG 19.5% | Control | 0.0367 | 0.034        | 1.637(0.063) | 1.36(0.126)  | 1.313(0.127) | 4.309(0.182)  | 11.390(6.046) | 0.198(0.043) | 0.009(0.004) |
|                     |             | AMP-PNP | 0.0339 | 0.316        | 2.475(0.254) | 1.592(0.181) |              | 4.067(0.156)  | 2.066(0.523)  | 0.015(0.006) |              |
|                     | ME/GG 19.2% | Control | 0.0347 | 0.064        | 1.619(0.126) | 1.380(0.140) | 2.246(1.280) | 5.245(1.393)  | 6.715(1.569)  | 0.212(0.062) | 0.004(0.004) |
|                     |             | AMP-PNP | 0.0294 | 0.289        | 2.195(0.211) | 1.627(0.172) |              | 3.822(0.133)  | 2.362(0.552)  | 0.021(0.007) |              |
|                     | ET/GG 19.4% | Control | 0.1242 | 0.135        | 1.496(0.201) | 1.371(0.150) | 1.426(0.198) | 4.293(0.255)  | 5.900(1.841)  | 0.293(0.134) | 0.009(0.005) |
|                     |             | AMP-PNP | 0.0491 | 0.033        | 1.696(0.082) | 1.306(0.130) | 1.189(0.330) | 4.191(0.419)  | 8.374(1.785)  | 0.143(0.030) | 0.006(0.004) |
| EETARFQPGYRS        | TD/GG 19.0% | Control | 0.0380 | 0.721        | 2.496(0.287) | 1.545(0.221) |              | 4.041(0.168)  | 1.854(0.441)  | 0.021(0.010) |              |
|                     |             | AMP-PNP | 0.0459 | 0.386        | 2.554(0.238) | 1.495(0.195) |              | 4.050(0.179)  | 1.623(0.291)  | 0.017(0.008) |              |
|                     | 2P-WT 19.5% | Control | 0.1002 | 0.631        | 4.011(0.299) | 2.396(0.185) |              | 6.408(0.110)  | 8.669(3.955)  | 0.085(0.022) |              |
|                     |             | AMP-PNP | 0.2146 | 0.705        | 4.038(0.297) | 2.190(0.188) |              | 6.228(0.100)  | 6.182(1.723)  | 0.107(0.025) |              |

|                           |       |         |        |       |              |              |              |                |              |
|---------------------------|-------|---------|--------|-------|--------------|--------------|--------------|----------------|--------------|
| 0P-WT                     | 19.0% | Control | 0.0345 | 0.761 | 3.931(0.257) | 2.479(0.207) | 6.410(0.111) | 5.662(1.604)   | 0.082(0.019) |
|                           |       | AMP-PNP | 0.0854 | 0.241 | 3.949(0.152) | 2.634(0.120) | 6.583(0.069) | 13.189(11.349) | 0.078(0.010) |
| LM/GG                     | 19.2% | Control | 0.0472 | 0.313 | 3.904(0.133) | 2.727(0.118) | 6.631(0.087) | 9.233(3.210)   | 0.064(0.010) |
|                           |       | AMP-PNP | 0.1468 | 0.315 | 3.794(0.215) | 2.650(0.133) | 6.444(0.072) | 9.142(3.540)   | 0.074(0.012) |
| ME/GG                     | 19.2% | Control | 0.1274 | 0.161 | 3.895(0.147) | 2.542(0.091) | 6.436(0.062) | 9.322(1.930)   | 0.087(0.012) |
|                           |       | AMP-PNP | 0.1934 | 0.238 | 4.138(0.183) | 2.358(0.115) | 6.497(0.089) | 6.680(1.246)   | 0.048(0.009) |
| ET/GG                     | 19.7% | Control | 0.1160 | 0.181 | 3.715(0.135) | 2.744(0.078) | 6.460(0.048) | 9.731(2.133)   | 0.825(0.008) |
|                           |       | AMP-PNP | 0.2473 | 0.317 | 4.108(0.204) | 2.425(0.124) | 6.533(0.087) | 7.925(1.622)   | 0.048(0.009) |
| TD/GG                     | 19.8% | Control | 0.0841 | 0.361 | 3.999(0.227) | 2.449(0.142) | 6.449(0.083) | 7.486(2.046)   | 0.088(0.015) |
|                           |       | AMP-PNP | 0.1592 | 0.338 | 3.955(0.232) | 2.604(0.148) | 6.559(0.091) | 11.702(8.467)  | 0.111(0.018) |
| 0P-ERK2 Ctl Avg. St. Dev. |       |         | 0.1539 |       |              |              |              |                |              |
| 2P-ERK2 Ctl Avg. St. Dev. |       |         | 0.1447 |       |              |              |              |                |              |
| Avg. across samples       |       |         | 0.1222 |       |              |              |              |                |              |

---

Footnotes:

- (1) Information for each peptide includes amino acid sequence, protein designation, % back exchange (BE), experimental condition ( $\pm$  AMP-PNP), the standard deviation of the # of deuterons incorporated at 1 min, and the residual sum of squares (RSS).
- (2) A, B, and C equal the number of amides exchanging with rates  $k_1$ ,  $k_2$ , and  $k_3$  respectively. N equals A+B+C.  
Values are corrected for artifactual in-exchange, back-exchange, and percentage D2O during the incubation.
- (3) Four peptides around the activation lip were differentially recovered in datasets of 0P-WT and hinge mutants vs 2P-WT-ERK2 (see Fig. S1).  
Three peptides were not observed in 2P-WT datasets. ARVADPDHDTGFLpTEpYVATR was observed only in 2P-WT datasets.
- (4) Peptides were not sequenced by LC-MS/MS but were identified by peptide mass fingerprinting.  
Peptide m/z were within 0.1 Da from calculated, and observed only in the hinge mutant
- (5) LLNTTCD showed individual variation between ERK2 forms. In LM/GG, the late time points showed low intensity and could not be fit, although error at 1 min could be calculated.  
ME/GG & ET/GG showed only one measurable time point in +AMP-PNP datasets, therefore errors could not be measured.
- (6) Fitted parameters were omitted when a peptide was not observed or not quantifiable
